# Supplementary material for: Desiccation tolerance in streptophyte algae and the algae to land plant transition: evolution of LEA and MIP protein families within the Viridiplantae
Source: PubMed Central journal article supplement (PMC7289719; doi:10.1093/jxb/eraa105), 2020-02-28
Supplement: eraa105_suppl_supplementary_table_s1.pdf [file eraa105_suppl_supplementary_table_s1.pdf]

Supplemental Table 1: Systematics, tentative assignment to subfamilies, no of amino acids and accession number of the protein sequences used for phylogenetic analyses (Figure 4) of the MIP protein family in streptophytes. *Physcomitrella patens* proteins were assigned according to Danielson and Johanson (2008). Proteins monophyletic with the *Physcomitrella patens* MIP subfamily with more than 90% bootstrap support were assigned to the same subfamily. Proteins monophyletic with less than 90% bootstrap support as subfamily like. A ? indicates proteins that could not be assigned to a specific subfamily.

| Class            | Species                      | Tentative assignment* | No of amino acids | Accession NO   |
|------------------|------------------------------|-----------------------|-------------------|----------------|
| Bryopsida        | <i>Physcomitrella patens</i> | PIP1.1                | 289               | XP_024369405.1 |
|                  |                              | PIP2.4                | 280               | XP_024390253.1 |
|                  |                              | SIP1.1                | 277               | XP_024403268.1 |
|                  |                              | TIP6.3                | 251               | XP_024364314.1 |
|                  |                              | TIP6.4                | 251               | XP_024382122.1 |
|                  |                              | SIP1.2                | 279               | XP_024359131.1 |
|                  |                              | NIP1                  | 246               | XP_024359109.1 |
|                  |                              | XIP1                  | 202               | XP_024389628.1 |
|                  |                              | XIP2                  | 201               | XP_024385941.1 |
|                  |                              | NIP5.1                | 228               | XP_024372976.1 |
|                  |                              | GIP                   | 370               | XP_024396316.1 |
|                  |                              | HIP                   | 246               | XP_024382299.1 |
| Marchantiopsida  | <i>Marchantia polymorpha</i> | XIP                   | 326               | PTQ48994.1     |
|                  |                              | XIP                   | 320               | PTQ48995.1     |
|                  |                              | TIP                   | 253               | PTQ50461.1     |
|                  |                              | TIP                   | 252               | PTQ29777.1     |
|                  |                              | HIP                   | 421               | PTQ28939.1     |
|                  |                              | PIP                   | 327               | PTQ27396.1     |
|                  |                              | PIP                   | 307               | PTQ39551.1     |
|                  |                              | NIP                   | 302               | PTQ47330.1     |
| Zygnematophyceae | <i>Spirogloea musicola</i>   | PIP-like              | 286               | SM000021S06406 |
|                  |                              | SIP                   | 250               | SM000093S24434 |
|                  |                              | PIP-like              | 286               | SM000037S13523 |
|                  |                              | ?                     | 487               | SM000090S24350 |

|  |                                   |                     |     |                |
|--|-----------------------------------|---------------------|-----|----------------|
|  |                                   | NIP                 | 366 | SM000354S13406 |
|  |                                   | ?                   | 262 | SM000200S05842 |
|  |                                   | PIP-like            | 290 | SM000298S10941 |
|  |                                   | PIP-like            | 230 | SM000050S17069 |
|  |                                   | PIP-like            | 252 | SM000007S20799 |
|  |                                   | HIP/TIP/PIP Cluster | 193 | SM000022S07242 |
|  |                                   | HIP/TIP/PIP Cluster | 322 | SM000017S02872 |
|  |                                   | NIP                 | 344 | SM000117S25509 |
|  |                                   | NIP                 | 344 | SM000055S18272 |
|  |                                   | NIP                 | 367 | SM000318S12225 |
|  |                                   | HIP/TIP/PIP Cluster | 136 | SM004309S15688 |
|  |                                   | HIP/TIP/PIP Cluster | 136 | SM004508S16472 |
|  |                                   | HIP/TIP/PIP Cluster | 108 | SM004806S16624 |
|  | <i>Mesotaenium endlicherianum</i> | HIP                 | 279 | ME000025S04443 |
|  |                                   | PIP-like            | 367 | ME000894S10208 |
|  |                                   | SIP                 | 239 | ME000329S05576 |
|  | <i>Zygnema circumcarinatum</i>    | GIP                 | 386 | MT010839       |
|  |                                   | HIP/TIP/PIP Cluster | 294 | MT010840       |
|  |                                   | HIP/TIP/PIP Cluster | 294 | MT010841       |
|  |                                   | NIP                 | 209 | MT010842       |
|  |                                   | HIP/TIP/PIP Cluster | 268 | MT010844       |
|  |                                   | HIP/TIP/PIP Cluster | 276 | MT010845       |
|  |                                   | NIP                 | 272 | MT010846       |

|                     |                                 |                     |     |               |
|---------------------|---------------------------------|---------------------|-----|---------------|
|                     |                                 | ?                   | 209 | MT010847      |
|                     |                                 | NIP                 | 440 | MT010848      |
|                     |                                 | HIP-like            | 450 | MT010849      |
| Mesostigmatophyceae | <i>Chlorokybus atmophyticus</i> | NIP                 | 345 | Chrsp6S07497  |
|                     |                                 | PIP-like            | 322 | Chrsp35S05281 |
|                     |                                 | GIP                 | 488 | Chrsp1S03082  |
|                     | <i>Mesostigma viride</i>        | XIP                 | 359 | Mesvi8S08640  |
| Klebsormidiophyceae | <i>Klebsormidium nitens</i>     | HIP-like            | 259 | GAQ81723.1    |
|                     |                                 | ?                   | 317 | GAQ81008.1    |
|                     |                                 | PIP-like            | 331 | GAQ80027.1    |
|                     |                                 | PIP-like            | 210 | GAQ85890.1    |
|                     |                                 | PIP-like            | 256 | GAQ80531.1    |
|                     |                                 | ?                   | 266 | GAQ81006.1    |
|                     |                                 | NIP                 | 279 | GAQ78837.1    |
|                     |                                 | ?                   | 220 | GAQ80844.1    |
|                     |                                 | NIP                 | 211 | GAQ82426.1    |
|                     |                                 | PIP-like            | 313 | GAQ90274.1    |
|                     |                                 | PIP-like            | 255 | GAQ93600.1    |
|                     |                                 | PIP-like            | 181 | GAQ92437.1    |
|                     |                                 | GIP                 | 386 | GAQ77677.1    |
| Charophyceae        | <i>Chara braunii</i>            | TIP-like            | 264 | GBG70937.1    |
|                     |                                 | HIP/TIP/PIP Cluster | 289 | GBG61162.1    |
|                     |                                 | HIP/TIP/PIP Cluster | 282 | GBG61164.1    |
|                     |                                 | HIP/TIP/PIP Cluster | 290 | GBG61166.1    |
|                     |                                 | TIP-like            | 330 | GBG92319.1    |
